# Supplementary material
Source: MDPI journal article supplement (https://www.mdpi.com/2073-445X/11/5/628)
Supplement: s1 [file s1]

Supplementary Material  
Figure S1

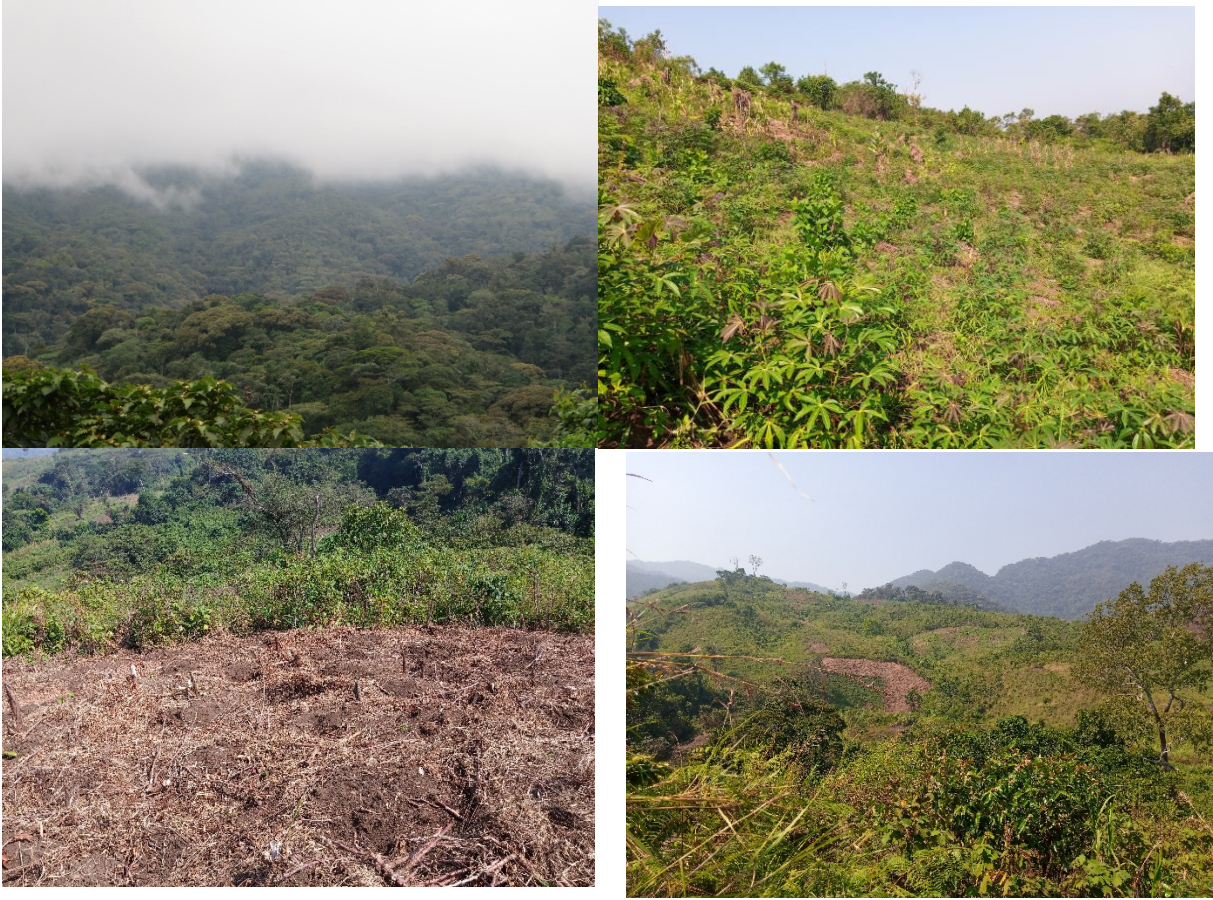

Figure S1. Top left: fog as a common climatic feature at high elevations. Top right: example of a farm with cassava intercrop with beans. Bottom left: example of weeds left to dry out and act as soil cover to maintain soil moisture. Bottom right: examples of farms on steep slopes (terracing is not common in both study areas).
